# Supplementary material for: Metagenomic analysis revealed a wide distribution of antibiotic resistance genes and biosynthesis of antibiotics in the gut of giant pandas
Source: PubMed Central journal article supplement (PMC7792088; doi:10.1186/s12866-020-02078-x), 2021-01-07
Supplement: 12866_2020_2078_MOESM4_ESM.pdf [file 12866_2020_2078_MOESM4_ESM.pdf]

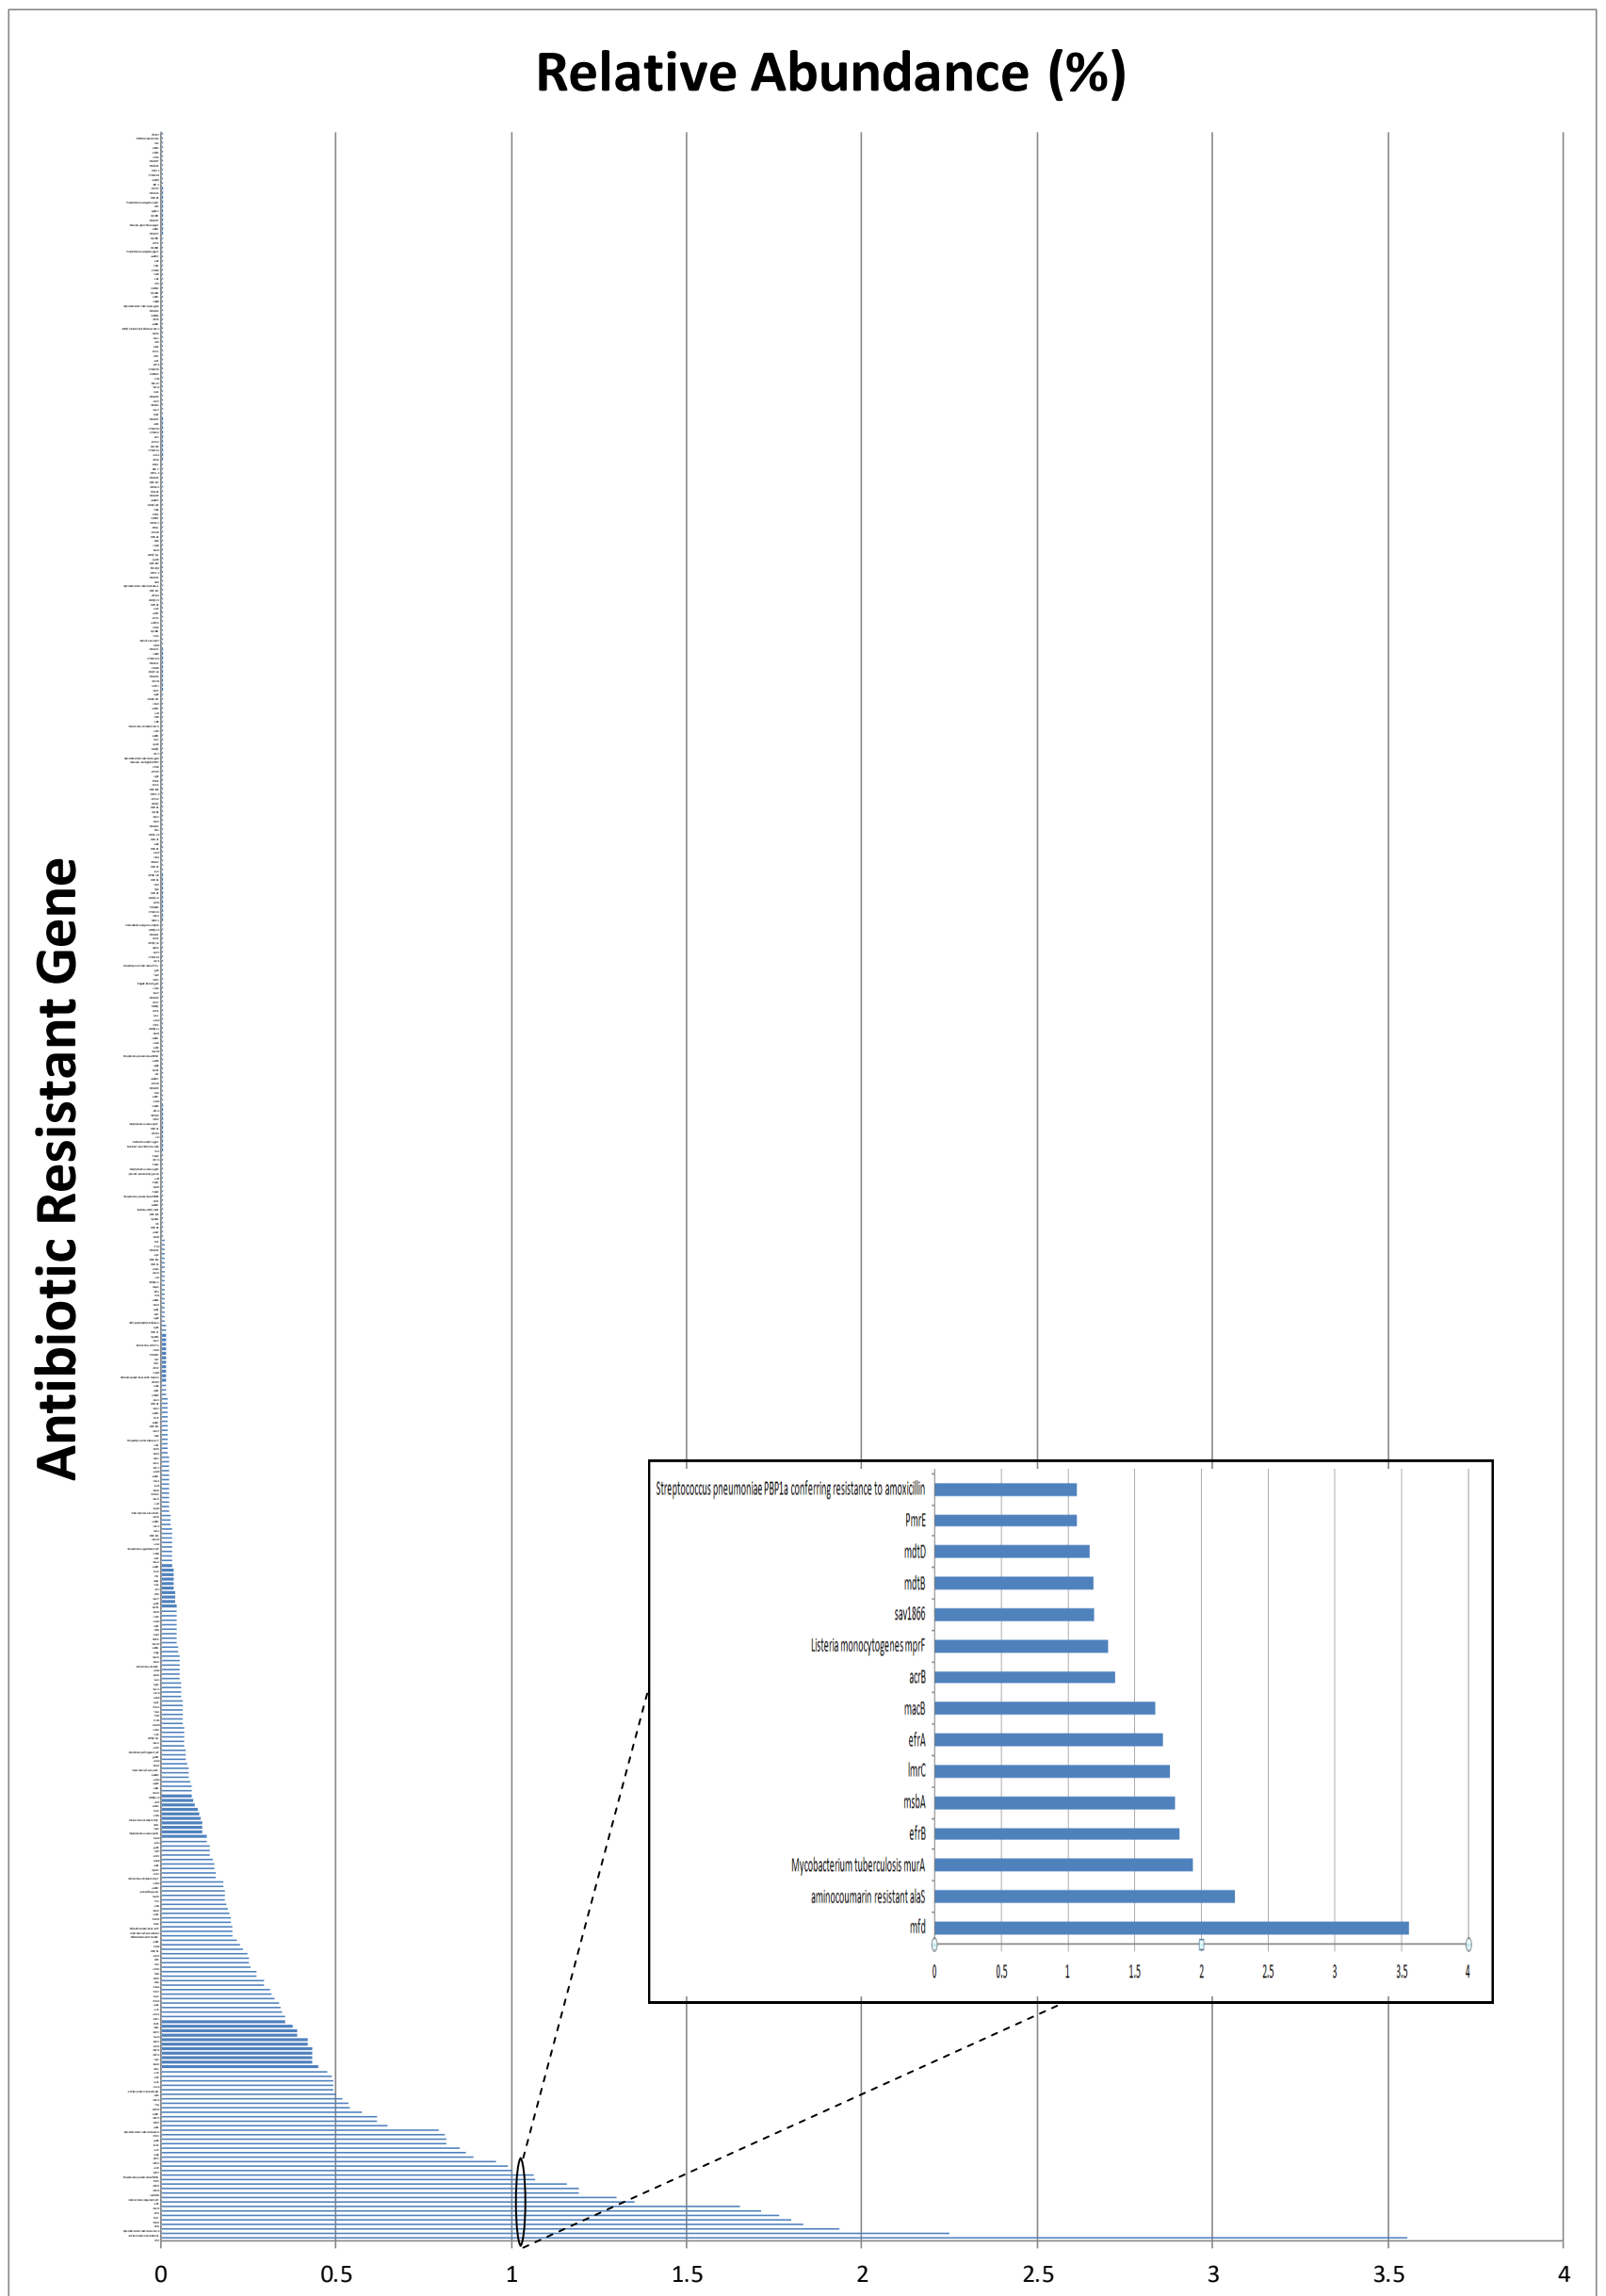

**Figure S2b:** The abundance of 570 ARGs ranged from 0.0001 % to 3.6%. Highlighted area indicating top most abundant ARGs.
